# Supplementary material for: Effect of Data Reduction Techniques on Daily Moderate to Vigorous Physical Activity Collected with ActiGraph® in People with COPD
Source: MDPI journal article supplement (doi:10.3390/jcm12165340), 2023-08-16
Supplement: s1 [file s1]

## Supplementary material

Effect of data reduction techniques on daily moderate to vigorous physical activity collected with ActiGraph® in people with COPD

**Table S1** – Summary output from the Aligned Rank Transform-ANOVA with cutoff, epoch, and filter effects on estimates of time spent in moderate-to-vigorous physical activities in people with chronic obstructive pulmonary disease ( $n = 136$ ).

| Fixed Effects                  | F-value | Partial eta squared | p-value |
|--------------------------------|---------|---------------------|---------|
| Filter                         | 520.90  | 0.79                | <0.001  |
| Epoch length                   | 518.79  | 0.79                | <0.001  |
| Cutoff                         | 206.78  | 0.61                | <0.001  |
| Filter x Epoch length          | 135.78  | 0.5                 | <0.001  |
| Filter x Cutoff                | 361     | 0.73                | <0.001  |
| Epoch length x Cutoff          | 234.57  | 0.63                | <0.001  |
| Filter x Epoch length x cutoff | 108.42  | 0.45                | <0.001  |

**Table S2** – Summary output from the Aligned Rank Transform-ANOVA with cutoff, epoch, and filter effects on estimates of time spent in moderate-to-vigorous physical activities including ActiGraph data from people with chronic obstructive pulmonary disease assessed before pulmonary rehabilitation ( $n = 121$ ).

| Fixed Effects                  | F-value | Partial eta squared | p-value |
|--------------------------------|---------|---------------------|---------|
| Filter                         | 563.56  | 0.82                | <0.001  |
| Epoch length                   | 477.44  | 0.8                 | <0.001  |
| Cutoff                         | 175.73  | 0.59                | <0.001  |
| Filter x Epoch length          | 184.03  | 0.61                | <0.001  |
| Filter x Cutoff                | 309.47  | 0.72                | <0.001  |
| Epoch length x Cutoff          | 219.75  | 0.65                | <0.001  |
| Filter x Epoch length x cutoff | 97.27   | 0.45                | <0.001  |

**Table S3** – Summary output from the Aligned Rank Transform-ANOVA with cutoff, epoch, and filter effects on estimates of time spent in moderate-to-vigorous physical activities including ActiGraph data from people with chronic obstructive pulmonary disease assessed after pulmonary rehabilitation ( $n = 15$ )

| Fixed Effects                  | F-value | Partial eta squared | P-value |
|--------------------------------|---------|---------------------|---------|
| Filter                         | 18.42   | 0.57                | <0.001  |
| Epoch length                   | 38.14   | 0.73                | <0.001  |
| Cutoff                         | 28.72   | 0.67                | <0.001  |
| Filter x Epoch length          | 6.57    | 0.32                | 0.023   |
| Filter x Cutoff                | 26.64   | 0.66                | <0.001  |
| Epoch length x Cutoff          | 15.86   | 0.53                | 0.001   |
| Filter x Epoch length x cutoff | 8.92    | 0.39                | <0.001  |

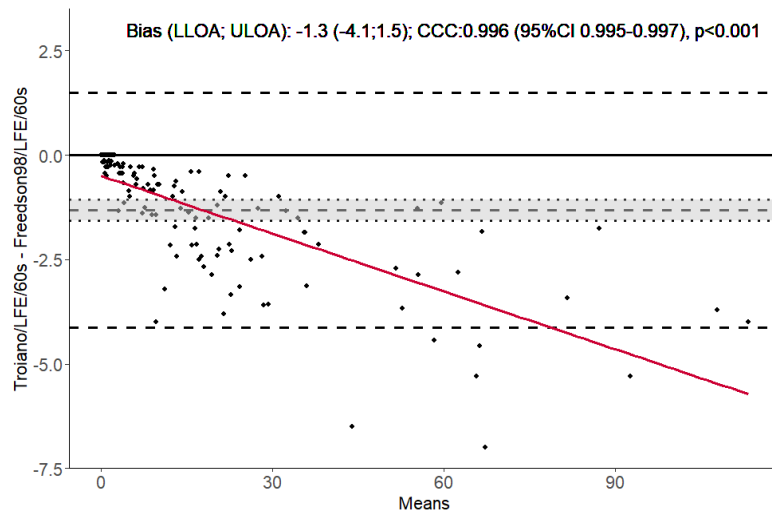

**Figure S1:** Bland–Altman 95% limits of agreement plot for Troiano and Freedson98 cutoffs, with 60-second epoch and low-frequency extension filter fixed in people with chronic obstructive pulmonary disease ( $n=136$ ). Dashed lines represent bias (mean difference), lower and upper limits of agreement and the grey shadow represent the 95% confidence interval of the mean difference. Bias, lower and upper limits of agreement, Lin’s correlation coefficient and the  $p$ -value for the slope of the linear regression of the differences on averages (red line) are presented. CCC - Lin’s concordance correlation coefficient. CI – Confidence interval; LLOA – lower limit of agreement; LFE – low frequency extension filter; ULOA – upper limit of agreement.

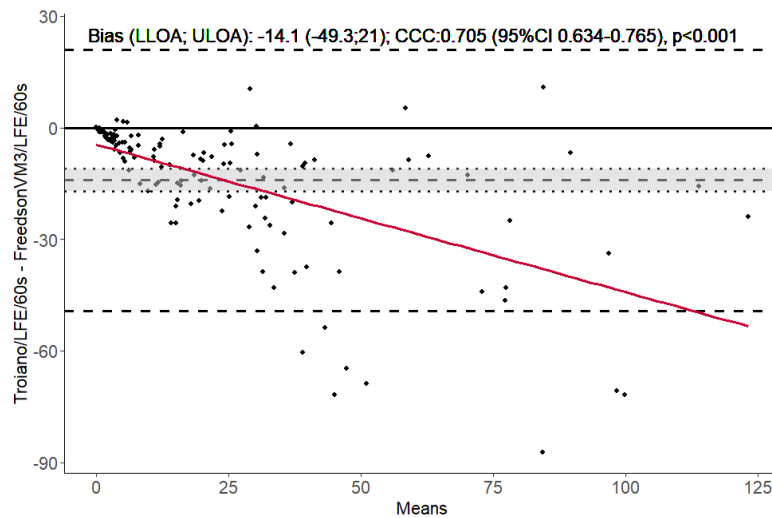

**Figure S2:** Bland–Altman 95% limits of agreement plot for Troiano and FreedsonVM3 cutoffs, with 60-second epoch and low-frequency extension filter fixed in people with chronic obstructive pulmonary disease ( $n=136$ ). Dashed lines represent bias (mean difference), lower and upper limits of agreement and the grey shadow represent the 95% confidence interval of the mean difference. Bias, lower and upper limits of agreement, Lin’s correlation coefficient and the  $p$ -value for the slope of the linear regression of the differences on averages (red line) are presented. CCC - Lin’s concordance correlation coefficient. CI – Confidence interval; LLOA – lower limit of agreement; LFE – low frequency extension filter; ULOA – upper limit of agreement.

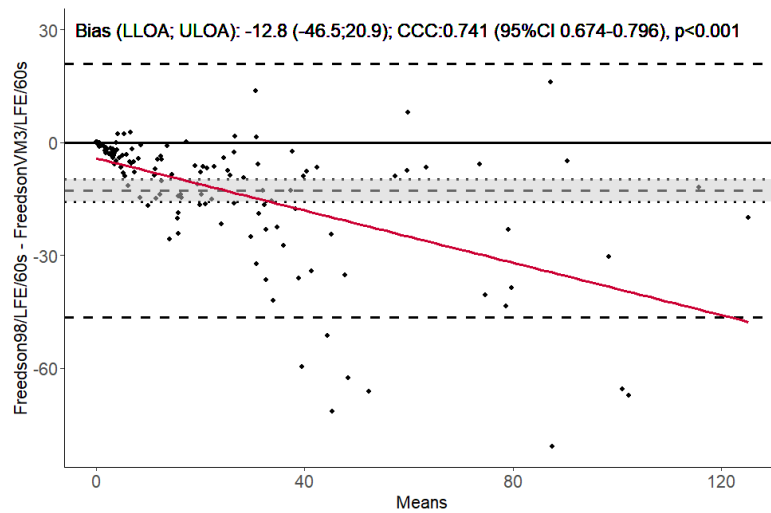

**Figure S3:** Bland–Altman 95% limits of agreement plot for Freedson98 and FreedsonVM3 cutoffs, with 60-second epoch and low-frequency extension filter fixed in people with chronic obstructive pulmonary disease ( $n=136$ ). Dashed lines represent bias (mean difference), lower and upper limits of agreement and the grey shadow represent the 95% confidence interval of the mean difference. Bias, lower and upper limits of agreement, Lin’s concordance correlation coefficient and the  $p$ -value for the slope of the linear regression of the differences on averages (red line) are presented. CCC - Lin’s concordance correlation coefficient. CI – Confidence interval; LLOA – lower limit of agreement; LFE – low frequency extension filter; ULOA – upper limit of agreement.

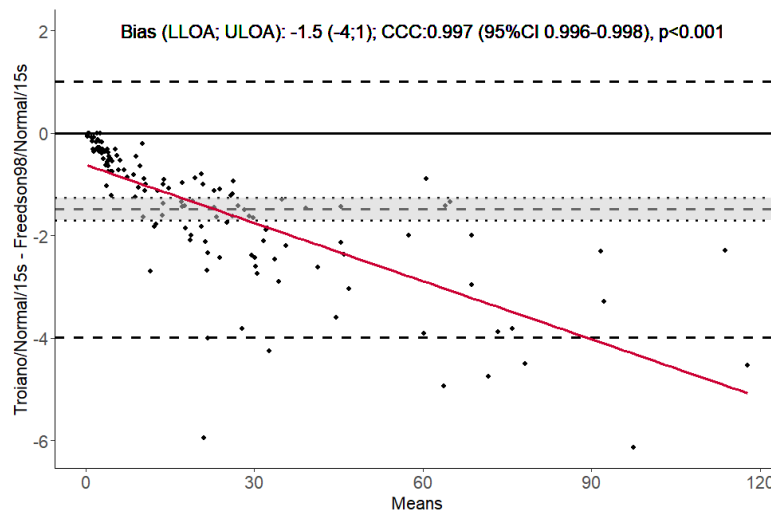

**Figure S4:** Bland–Altman 95% limits of agreement plot for Troiano and Freedson98 cutoffs, with 15-second epoch and normal filter fixed in people with chronic obstructive pulmonary disease ( $n=136$ ). Dashed lines represent bias (mean difference), lower and upper limits of agreement and the grey shadow represent the 95% confidence interval of the mean difference. Bias, lower and upper limits of agreement, Lin’s concordance correlation coefficient and the  $p$ -value for the slope of the linear regression of the differences on averages (red line) are presented. CCC - Lin’s concordance correlation coefficient. CI – Confidence interval; LLOA – lower limit of agreement; ULOA – upper limit of agreement.

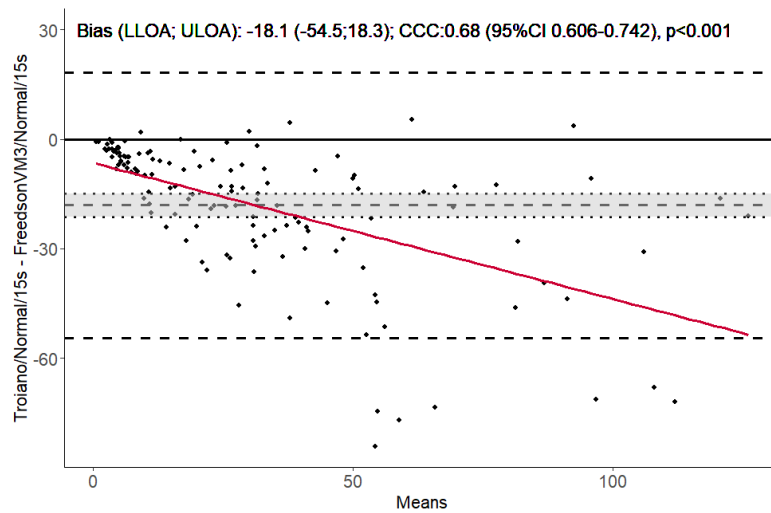

**Figure S5:** Bland–Altman 95% limits of agreement plot for Troiano and FreedsonVM3 cutoffs, with 15-second epoch and normal filter fixed in people with chronic obstructive pulmonary disease ( $n=136$ ). Dashed lines represent bias (mean difference), lower and upper limits of agreement and the grey shadow represent the 95% confidence interval of the mean difference. Bias, lower and upper limits of agreement, Lin’s correlation coefficient and the  $p$ -value for the slope of the linear regression of the differences on averages (red line) are presented. CCC - Lin’s concordance correlation coefficient. CI – Confidence interval; LLOA – lower limit of agreement; ULOA – upper limit of agreement.

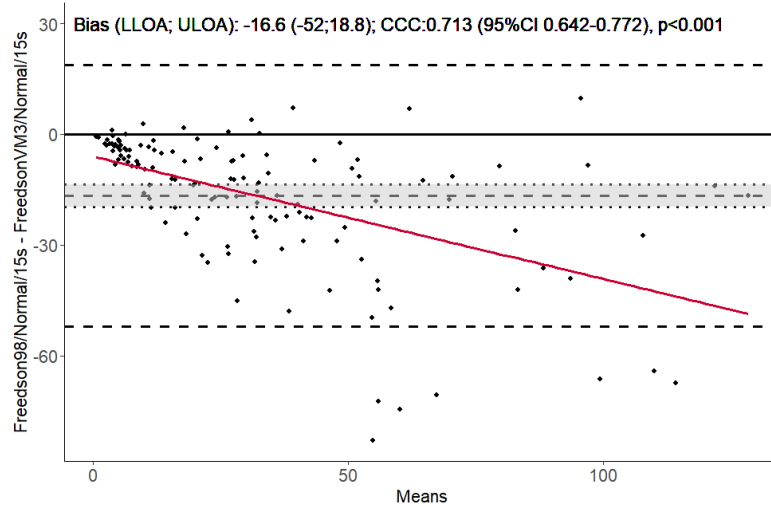

**Figure S6:** Bland–Altman 95% limits of agreement plot for Freedson98 and FreedsonVM3 cutoffs, with 15-second epoch and normal filter fixed in people with chronic obstructive pulmonary disease ( $n=136$ ). Dashed lines represent bias (mean difference), lower and upper limits of agreement and the grey shadow represent the 95% confidence interval of the mean difference. Bias, lower and upper limits of agreement, Lin’s correlation coefficient and the  $p$ -value for the slope of the linear regression of the differences on averages (red line) are presented. CCC - Lin’s concordance correlation coefficient. CI – Confidence interval; LLOA – lower limit of agreement; ULOA – upper limit of agreement.

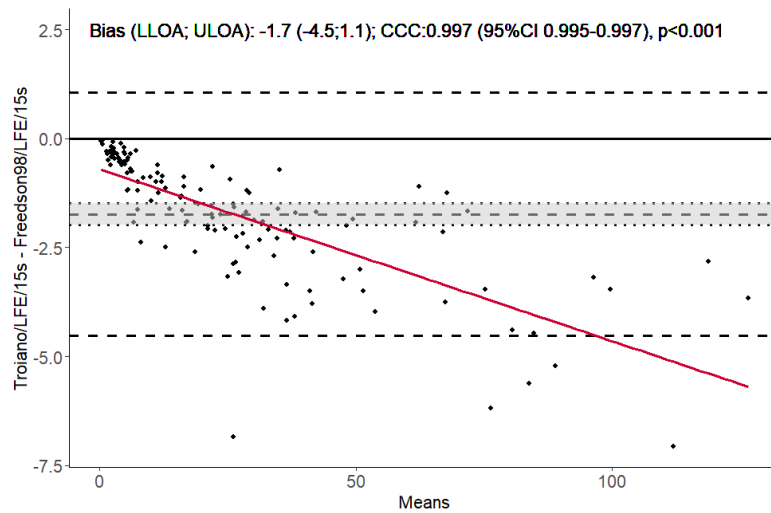

**Figure S7:** Bland–Altman 95% limits of agreement plot for Troiano and Freedson98 cutoffs, with 15-second epoch and low-frequency extension filter fixed in people with chronic obstructive pulmonary disease ( $n=136$ ). Dashed lines represent bias (mean difference), lower and upper limits of agreement and the grey shadow represent the 95% confidence interval of the mean difference. Bias, lower and upper limits of agreement, Lin’s correlation coefficient and the  $p$ -value for the slope of the linear regression of the differences on averages (red line) are presented. CCC - Lin’s concordance correlation coefficient. CI – Confidence interval; LLOA – lower limit of agreement; LFE – low frequency extension filter; ULOA – upper limit of agreement.

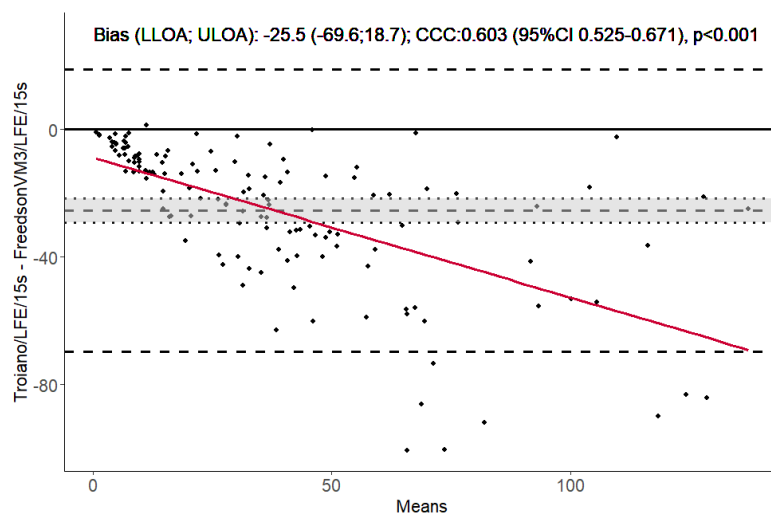

**Figure S8:** Bland–Altman 95% limits of agreement plot for Troiano and FreedsonVM3 cutoffs, with 15-second epoch and low-frequency extension filter fixed in people with chronic obstructive pulmonary disease ( $n=136$ ). Dashed lines represent bias (mean difference), lower and upper limits of agreement and the grey shadow represent the 95% confidence interval of the mean difference. Bias, lower and upper limits of agreement, Lin’s correlation coefficient and the  $p$ -value for the slope of the linear regression of the differences on averages (red line) are presented. CCC - Lin’s concordance correlation coefficient. CI – Confidence interval; LLOA – lower limit of agreement; LFE – low frequency extension filter; ULOA – upper limit of agreement.

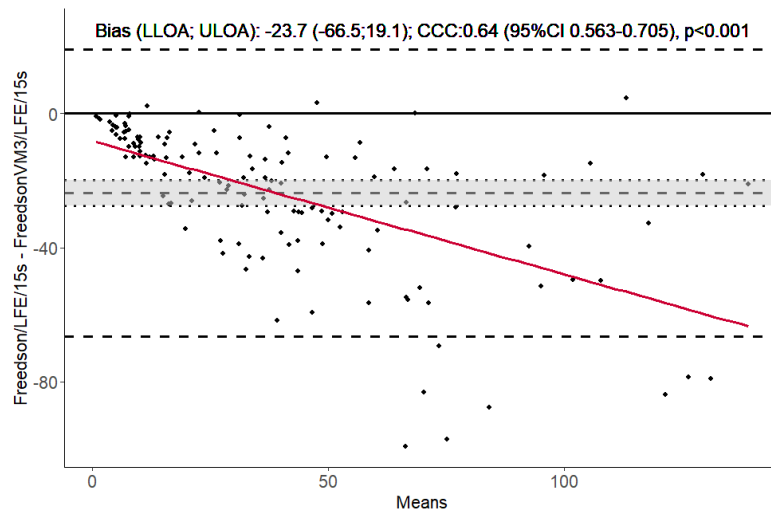

**Figure S9:** Bland–Altman 95% limits of agreement plot for Freedson98 and FreedsonVM3 cutoffs, with 15-second epoch and low-frequency extension filter fixed in people with chronic obstructive pulmonary disease ( $n=136$ ). Dashed lines represent bias (mean difference), lower and upper limits of agreement and the grey shadow represent the 95% confidence interval of the mean difference. Bias, lower and upper limits of agreement, Lin’s concordance correlation coefficient and the  $p$ -value for the slope of the linear regression of the differences on averages (red line) are presented. CCC - Lin’s concordance correlation coefficient. CI – Confidence interval; LLOA – lower limit of agreement; LFE – low frequency extension filter; ULOA – upper limit of agreement.

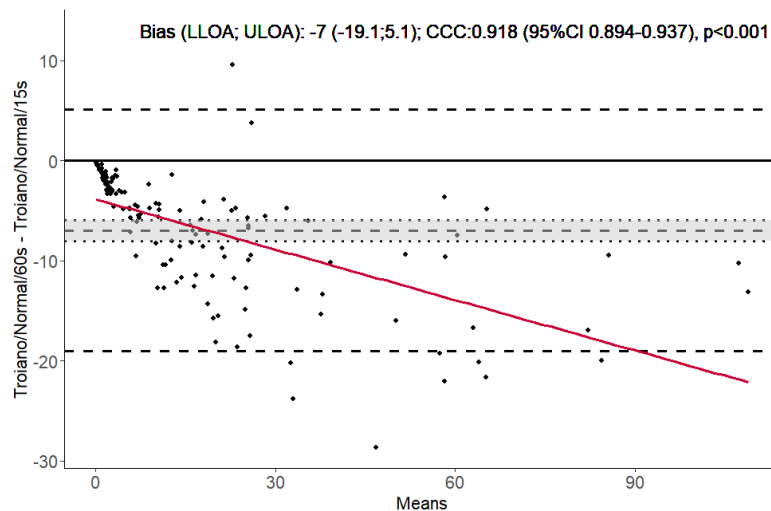

**Figure S10:** Bland–Altman 95% limits of agreement plot for 60-second and 15-second epochs, with Troiano cutoff and normal filter fixed in people with chronic obstructive pulmonary disease ( $n=136$ ). Dashed lines represent bias (mean difference), lower and upper limits of agreement and the grey shadow represent the 95% confidence interval of the mean difference. Bias, lower and upper limits of agreement, Lin’s concordance correlation coefficient and the  $p$ -value for the slope of the linear regression of the differences on averages (red line) are presented. CCC - Lin’s concordance correlation coefficient. CI – Confidence interval; LLOA – lower limit of agreement; ULOA – upper limit of agreement.

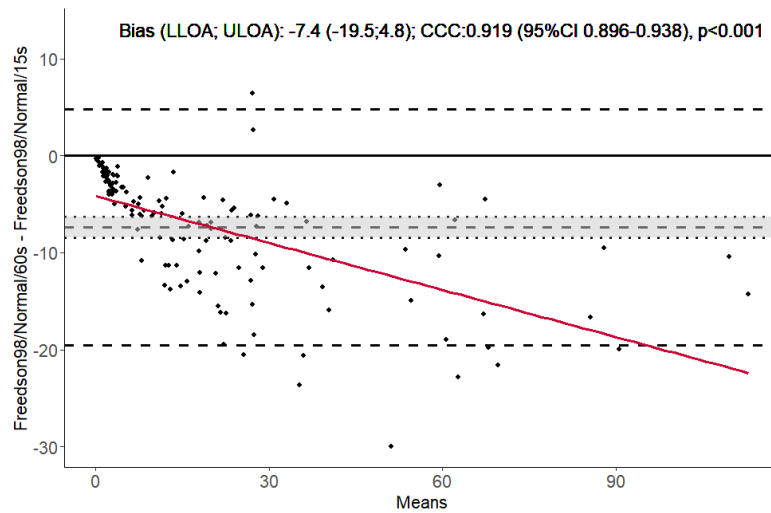

**Figure S11:** Bland–Altman 95% limits of agreement plot for 60-second and 15-second epochs, with Freedson98 cutoff and normal filter fixed in people with chronic obstructive pulmonary disease ( $n=136$ ). Dashed lines represent bias (mean difference), lower and upper limits of agreement and the grey shadow represent the 95% confidence interval of the mean difference. Bias, lower and upper limits of agreement, Lin’s correlation coefficient and the  $p$ -value for the slope of the linear regression of the differences on averages (red line) are presented. CCC - Lin’s concordance correlation coefficient. CI – Confidence interval; LLOA – lower limit of agreement; ULOA – upper limit of agreement.

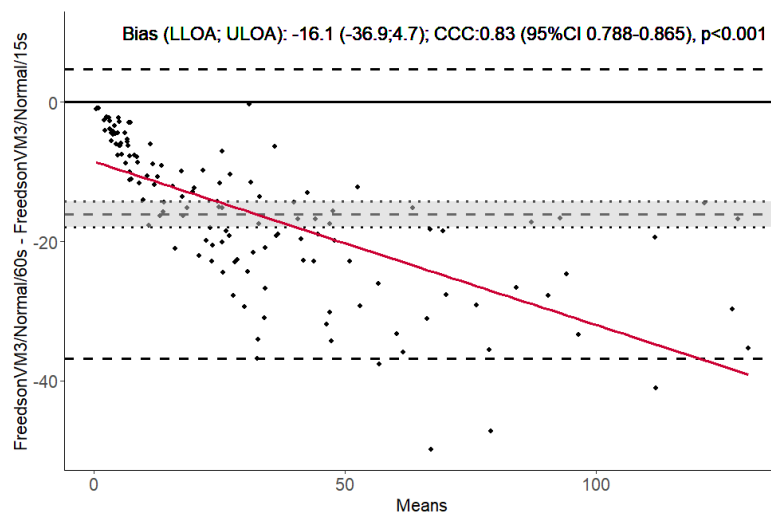

**Figure S12:** Bland–Altman 95% limits of agreement plot for 60-second and 15-second epochs, with FreedsonVM3 cutoff and normal filter fixed in people with chronic obstructive pulmonary disease ( $n=136$ ). Dashed lines represent bias (mean difference), lower and upper limits of agreement and the grey shadow represent the 95% confidence interval of the mean difference. Bias, lower and upper limits of agreement, Lin’s correlation coefficient and the  $p$ -value for the slope of the linear regression of the differences on averages (red line) are presented. CCC - Lin’s concordance correlation coefficient. CI – Confidence interval; LLOA – lower limit of agreement; ULOA – upper limit of agreement.

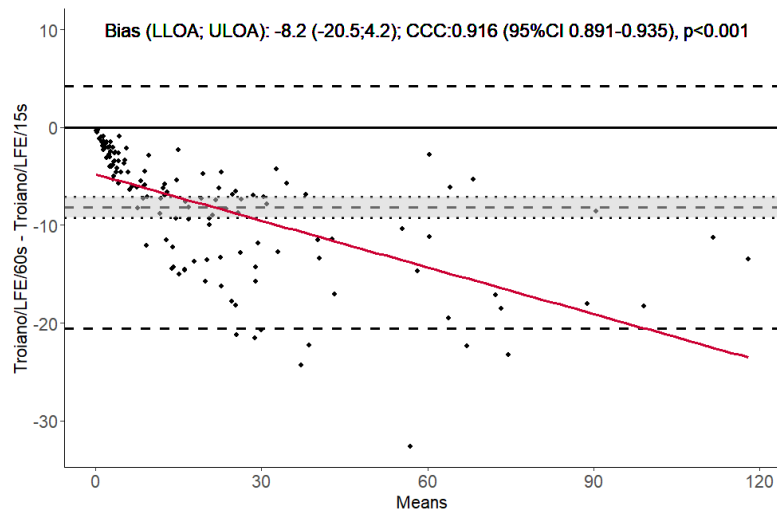

**Figure S13:** Bland–Altman 95% limits of agreement plot for 60-second and 15-second epochs, with Troiano cutoff and low frequency extension filter fixed in people with chronic obstructive pulmonary disease ( $n=136$ ). Dashed lines represent bias (mean difference), lower and upper limits of agreement and the grey shadow represent the 95% confidence interval of the mean difference. Bias, lower and upper limits of agreement, Lin’s concordance coefficient and the  $p$ -value for the slope of the linear regression of the differences on averages (red line) are presented. CCC - Lin’s concordance correlation coefficient. CI – Confidence interval; LLOA – lower limit of agreement; LFE – low frequency extension filter; ULOA – upper limit of agreement.

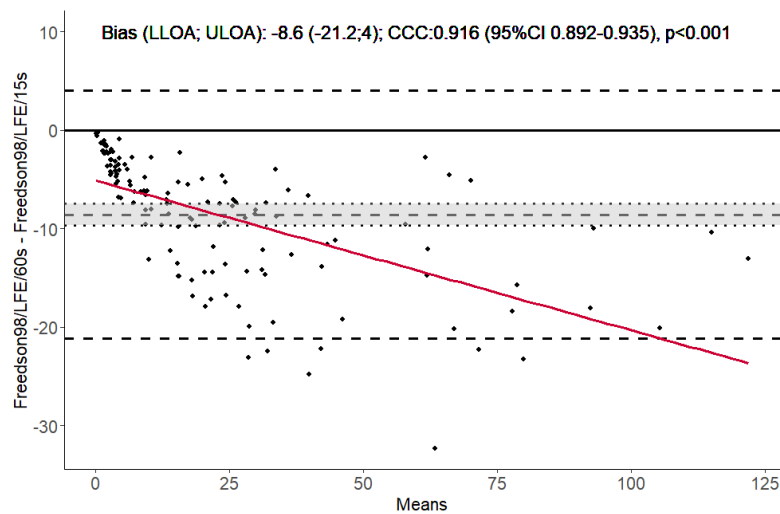

**Figure S14:** Bland–Altman 95% limits of agreement plot for 60-second and 15-second epochs, with Freedson98 cutoff and low frequency extension filter fixed in people with chronic obstructive pulmonary disease ( $n=136$ ). Dashed lines represent bias (mean difference), lower and upper limits of agreement and the grey shadow represent the 95% confidence interval of the mean difference. Bias, lower and upper limits of agreement, Lin’s concordance coefficient and the  $p$ -value for the slope of the linear regression of the differences on averages (red line) are presented. CCC - Lin’s concordance correlation coefficient. CI – Confidence interval; LLOA – lower limit of agreement; LFE – low frequency extension filter; ULOA – upper limit of agreement.



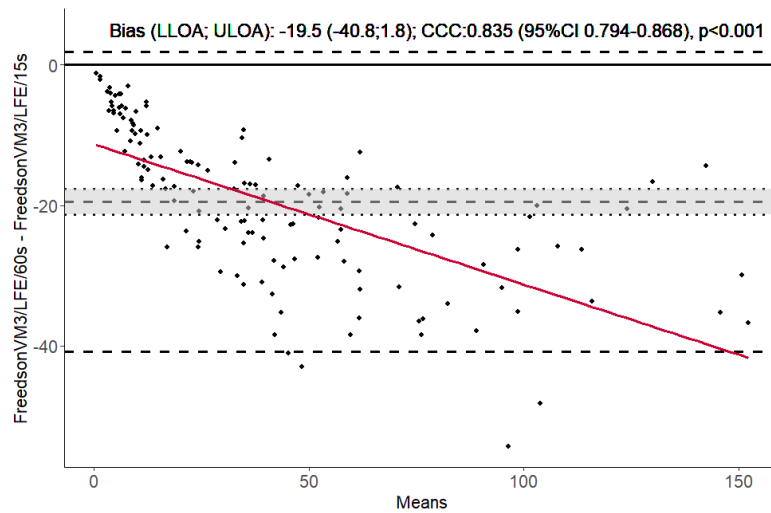

**Figure S15:** Bland–Altman 95% limits of agreement plot for 60-second and 15-second epochs, with FreedsonVM3 cutoff and low frequency extension filter fixed in people with chronic obstructive pulmonary disease ( $n=136$ ). Dashed lines represent bias (mean difference), lower and upper limits of agreement and the grey shadow represent the 95% confidence interval of the mean difference. Bias, lower and upper limits of agreement, Lin's correlation coefficient and the  $p$ -value for the slope of the linear regression of the differences on averages (red line) are presented. CCC - Lin's concordance correlation coefficient. CI – Confidence interval; LLOA – lower limit of agreement; LFE – low frequency extension filter; ULOA – upper limit of agreement.

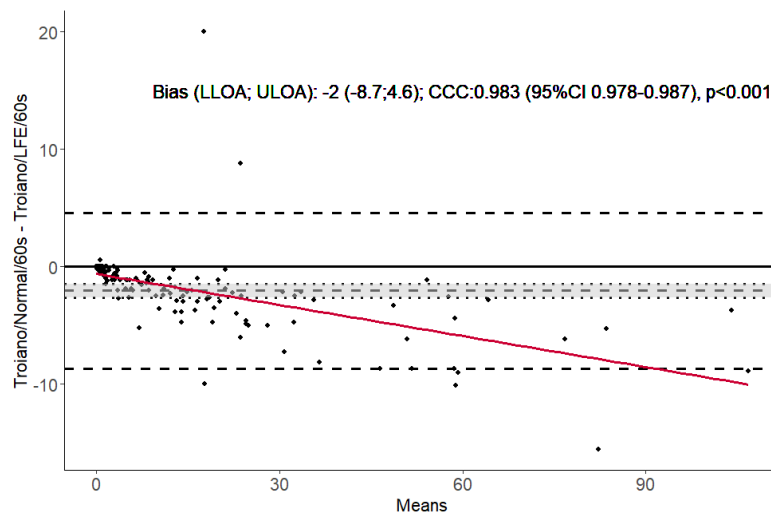

**Figure S16:** Bland–Altman 95% limits of agreement plot for normal and low-frequency extension filters, with Troiano cutoff and 60-second epochs fixed in people with chronic obstructive pulmonary disease ( $n=136$ ). Dashed lines represent bias (mean difference), lower and upper limits of agreement and the grey shadow represent the 95% confidence interval of the mean difference. Bias, lower and upper limits of agreement, Lin's correlation coefficient and the  $p$ -value for the slope of the linear regression of the differences on averages (red line) are presented. CCC - Lin's concordance correlation coefficient. CI – Confidence interval; LLOA – lower limit of agreement; LFE – low frequency extension filter; ULOA – upper limit of agreement.

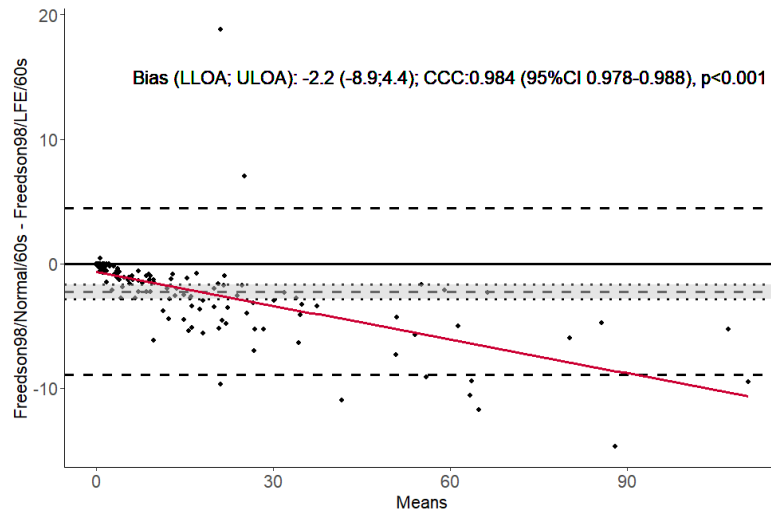

**Figure S17:** Bland–Altman 95% limits of agreement plot for normal and low-frequency extension filters, with Freedson98 cutoff and 60-second epochs fixed in people with chronic obstructive pulmonary disease ( $n=136$ ). Dashed lines represent bias (mean difference), lower and upper limits of agreement and the grey shadow represent the 95% confidence interval of the mean difference. Bias, lower and upper limits of agreement, Lin's correlation coefficient and the  $p$ -value for the slope of the linear regression of the differences on averages (red line) are presented. CCC - Lin's concordance correlation coefficient. CI – Confidence interval; LLOA – lower limit of agreement; LFE – low frequency extension filter; ULOA – upper limit of agreement.

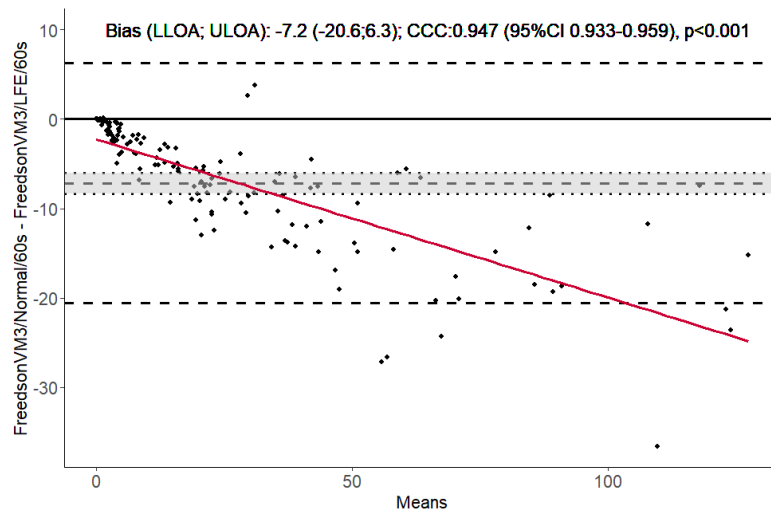

**Figure S18:** Bland–Altman 95% limits of agreement plot for normal and low-frequency extension filters, with FreedsonVM3 cutoff and 60-second epochs fixed in people with chronic obstructive pulmonary disease ( $n=136$ ). Dashed lines represent bias (mean difference), lower and upper limits of agreement and the grey shadow represent the 95% confidence interval of the mean difference. Bias, lower and upper limits of agreement, Lin's correlation coefficient and the  $p$ -value for the slope of the linear regression of the differences on averages (red line) are presented. CCC - Lin's concordance correlation coefficient. CI – Confidence interval; LLOA – lower limit of agreement; LFE – low frequency extension filter; ULOA – upper limit of agreement.

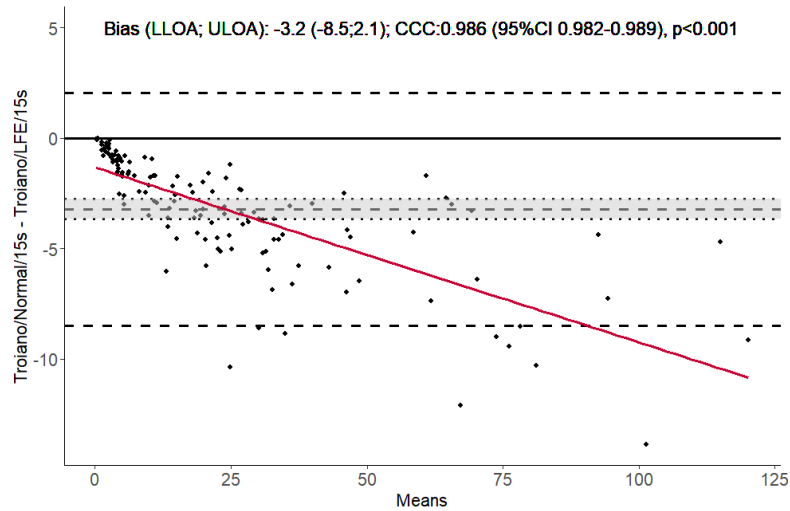

**Figure S19:** Bland–Altman 95% limits of agreement plot for normal and low-frequency extension filters, with Troiano cutoff and 15-second epochs fixed in people with chronic obstructive pulmonary disease ( $n=136$ ). Dashed lines represent bias (mean difference), lower and upper limits of agreement and the grey shadow represent the 95% confidence interval of the mean difference. Bias, lower and upper limits of agreement, Lin’s concordance coefficient and the  $p$ -value for the slope of the linear regression of the differences on averages (red line) are presented. CCC - Lin’s concordance correlation coefficient. CI – Confidence interval; LLOA – lower limit of agreement; LFE – low frequency extension filter; ULOA – upper limit of agreement.

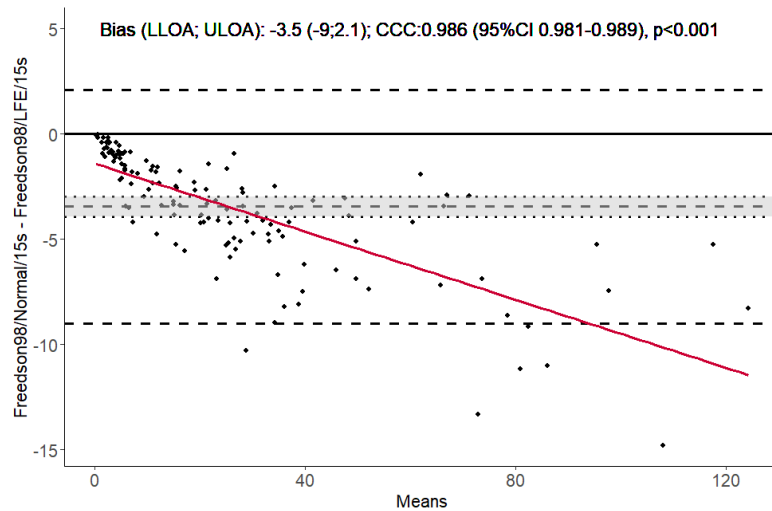

**Figure S20:** Bland–Altman 95% limits of agreement plot for normal and low-frequency extension filters, with Freedson98 cutoff and 15-second epochs fixed in people with chronic obstructive pulmonary disease ( $n=136$ ). Dashed lines represent bias (mean difference), lower and upper limits of agreement and the grey shadow represent the 95% confidence interval of the mean difference. Bias, lower and upper limits of agreement, Lin’s concordance coefficient and the  $p$ -value for the slope of the linear regression of the differences on averages (red line) are presented. CCC - Lin’s concordance correlation coefficient. CI – Confidence interval; LLOA – lower limit of agreement; LFE – low frequency extension filter; ULOA – upper limit of agreement.

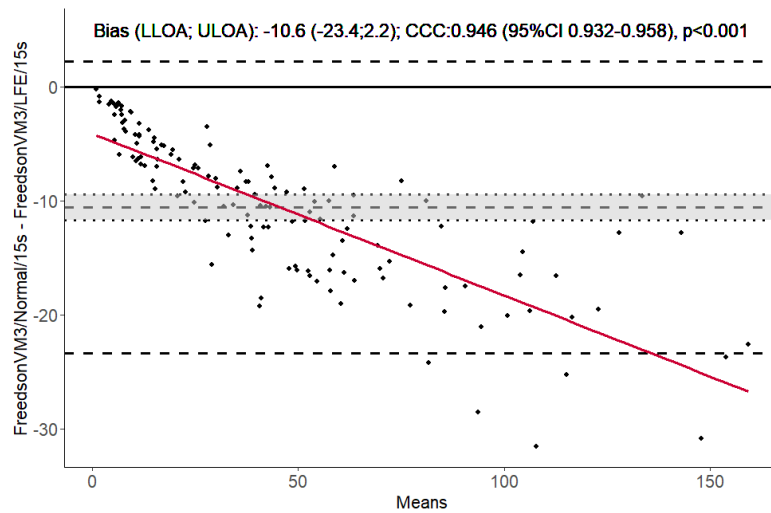

**Figure S21:** Bland–Altman 95% limits of agreement plot for normal and low-frequency extension filters, with FreedsonVM3 cutoff and 15-second epochs fixed in people with chronic obstructive pulmonary disease ( $n=136$ ). Dashed lines represent bias (mean difference), lower and upper limits of agreement and the grey shadow represent the 95% confidence interval of the mean difference. Bias, lower and upper limits of agreement, Lin’s concordance coefficient and the  $p$ -value for the slope of the linear regression of the differences on averages (red line) are presented. CCC - Lin’s concordance correlation coefficient. CI – Confidence interval; LLOA – lower limit of agreement; LFE – low frequency extension filter; ULOA – upper limit of agreement.
